# 1 “We just considered it [Rift Valley Fever virus] to be over there”: A qualitative 2 study exploring urban perspectives for disease introduction

3  
4 Keli N Gerken, Justinah Maluni, Francis Mutuku, Bryson Ndenga, Caroline Ichura, Luti Mwashee, Makena  
5 Mwaniki, Karren Shaita, Stella Orwa, Krish Seetah, A. Desiree LaBeaud  
6

## 7 **Abstract**

8 Rift Valley fever virus (RVFV) is a zoonotic arbovirus that is also transmitted to humans from  
9 fluids and tissues of infected livestock. Urban areas in Kenya have the hosts, dense vector distributions,  
10 and source livestock (often from high-risk locations to meet the demand for animal protein), yet there  
11 has never been a documented urban outbreak of RVFV. To understand the likely risk of RVFV  
12 introduction in urban communities and guide future initiatives, we conducted Focus Group Discussions  
13 with slaughterhouse workers, slaughterhouse animal product traders, and dairy livestock owners in  
14 Kisumu City and Ukunda Town in Kenya. For added perspective and data triangulation, in-depth  
15 interviews were conducted one-on-one with meat inspector veterinarians from selected  
16 slaughterhouses.

17 Themes on benefits of livestock in the urban setting were highlighted, including business  
18 opportunities, social status, and availability of fresh milk in the household. Urban slaughterhouses have  
19 formalized meat trading, which in turn has resulted in regulation for meat inspection and reduction in  
20 local livestock theft. High-risk groups have moderate knowledge about zoonotic diseases and consensus  
21 was towards lower personal risk in the urban setting compared to rural areas. Risk assessment was  
22 focused on hand hygiene rather than the slaughtering process. There was high reliance on veterinarians  
23 to confirm animal health and meat safety, yet veterinarians reported lack access to RVFV diagnostics.  
24 We also highlighted regulatory vulnerabilities relevant to RVFV transmission including corruption in  
25 meat certification outside of the slaughterhouse system, and blood collected during slaughter being  
26 used for food and medicine. These factors, when compounded by urban vector abundance and dense  
27 human and animal populations could create ideal conditions for RVFV to emerge in endemic regions and  
28 establish an urban transmission cycle. Here, we present a qualitative study that provides context for  
29 urban RVFV introduction risks and insight for adapting current prevention and control measures.  
30

## 31 **Author summary**

32 Rift Valley fever is a globally important zoonotic virus that is also transmitted directly to humans  
33 from infected livestock. This qualitative study aimed to explore and understand risk of Rift Valley Fever  
34 urban introduction from the perspective of individuals likely at a high-risk of infection in the urban  
35 setting. There has never been an urban outbreak of RVFV, however, other arboviruses have caused  
36 devastating urban outbreaks driven by urban transmission cycles in vectors. RVFV has a complex  
37 epidemiology and urban centers of endemic regions may be particularly vulnerable as they import large  
38 quantities of livestock for slaughter and milk to meet the high urban demand for animal sourced foods  
39 and have dense vector populations. This qualitative study provides insights on the opinions and lived  
40 experiences of urban high-risk groups including slaughterhouse affiliates, livestock owners, and  
41 veterinarians. We also demonstrate risks specific to RVFV transmission and regulatory vulnerabilities  
42 that would affect ability to detect disease introduction. The results of this study are intended to guide  
43 future initiatives aiming to investigate urban introduction of RVFV and determine how the urban disease  
44 ecology differs from what has been demonstrated in rural areas.  
45  
46  
47

48 **Introduction**

49 Rift Valley fever virus (RVFV) is a zoonotic arbovirus with a transmission pathway heavily reliant  
50 on socio-cultural interactions with livestock (1). Communities that live in close contact with their  
51 livestock are more likely to be exposed to RVFV which has resulted in a confounded understanding of  
52 animal contact risk factors (2,3). Other arboviruses have caused devastating outbreaks in urban areas,  
53 but there has never been a documented urban outbreak of RVFV (4–6). Limited knowledge of urban  
54 RVFV transmission may have resulted in these areas being omitted from mitigation and outbreak  
55 planning (7). As the continent of Africa, where RVFV is endemic, is rapidly urbanizing and will soon lead  
56 the world in urban growth, a major proportion of future RVFV risk remains unqualified. (8).

57  
58 The spread of RVFV to new areas primarily relies on movement of infected livestock (9). Urban  
59 areas may be particularly vulnerable to RVFV with their dense vector distribution and increased demand  
60 for animal-sourced foods (ASFs) and must source livestock and animal products from a wide  
61 geographical range. A recent study of two urban areas in Kenya, Kisumu (Western region) and Ukunda  
62 (South Coast), revealed a 2% human seroprevalence and highlighted potential sourcing of fresh milk as a  
63 potential source of exposure independent of livestock ownership (10). Indeed, the high demand for ASFs  
64 in urban areas is well documented in Sub-Saharan Africa, and urban areas often have large tertiary  
65 markets (11). To meet demand, animals are imported, alongside a thriving practice in raising livestock  
66 within urban contexts (12). Thus, there are two key populations of livestock in urban centers:  
67 residential, and regionally imported livestock entering the meat value chain.

68 In Sub-Saharan African, where RVFV is endemic, recent urbanization over the past 60 years is  
69 unprecedented (13). Urban populations in Africa are projected to more than triple over the next four  
70 decades and correspond to 21% of the world's urban population (14). As people migrate to the city for  
71 more diverse employment opportunities, better access to healthcare services, and education

72 opportunities, marginalized groups, and the poorest poor face extreme challenges. Inequalities in basic  
73 infrastructure result in a lack of piped water, inadequate drainage of sewers and surface water, and  
74 higher flooding potential (15). Meanwhile, the lack of proper solid waste management leads to build up  
75 of plastic trash that accumulates rainwater and is a preferred breeding site for *Aedes* spp. mosquitos  
76 that transmit arboviruses. (16). Furthermore, and relevant to RVFV transmission, processes of  
77 urbanization have occurred rapidly and often over a single generation. Cultural practices may carry  
78 different or even higher risk in the urban setting, for example, consumption of raw meat that was  
79 slaughtered in a high-volume facility (17). Overall, more preparedness is required for arboviruses  
80 because other arboviruses have already proven potential to established urban transmission cycles and  
81 have caused devastating outbreaks driven by altered environmental conditions and shifting mosquito  
82 populations. (18,19).

83           In addition to understanding how changing ecological conditions affect risk, the social context of  
84 disease is equally important for RVFV. Public health messages that understand and incorporate high-risk  
85 populations' concerns, reality, and perceptions innately have higher success rates for reducing the  
86 burden of disease. As highlighted by the recent health messaging during the Covid-19 pandemic, urban  
87 populations may be willing yet simply unable to follow health messages particularly when their  
88 livelihoods are also at risk (20). For zoonotic livestock diseases, this effect is compounded for those that  
89 rely on livestock in urban settings and suddenly lose employment, market access, and purchasing power  
90 from closure of livestock markets and restriction of animal movement (21). As RVFV outbreaks have  
91 been demonstrated in a variety of climates and ecological conditions (22), understanding the key  
92 difference between rural and urban risk factors could allow for inclusive, targeted, public health  
93 responses. Similarly, understanding how high-risk groups could be expected to respond can guide  
94 population level control measures. To understand urban RVFV risk in greater detail and to guide  
95 approaches for developing urban preventive and control measures, we carried out a qualitative study

96 with urban populations we considered to be of highest risk: slaughterhouse affiliates and livestock  
97 owners. The data from this study is intended to inform urban preparation, highlight regulatory  
98 vulnerabilities for RVFV transmission, and identify opportunities for early detection when regional risk is  
99 high.

## 100 **Materials and Methods**

### 101 **Study Design**

102 We carried out a comparative qualitative study between two urban study sites in Kenya in  
103 August and September 2021 (Figure 1). A total of ten focus group discussions (FGDs) were conducted to  
104 understand the consensus of groups that we considered to be at high-risk for RVFV in urban settings:  
105 slaughterhouse affiliates and livestock owners. To triangulate data from each respective slaughterhouse,  
106 veterinarians who were meat inspectors responded to in-depth interviews (IDIs) on their perception of  
107 risk, experience containing RVFV, and predictions for urban outbreak responses.

108 **Fig 1: Study design at sites in Kenya**

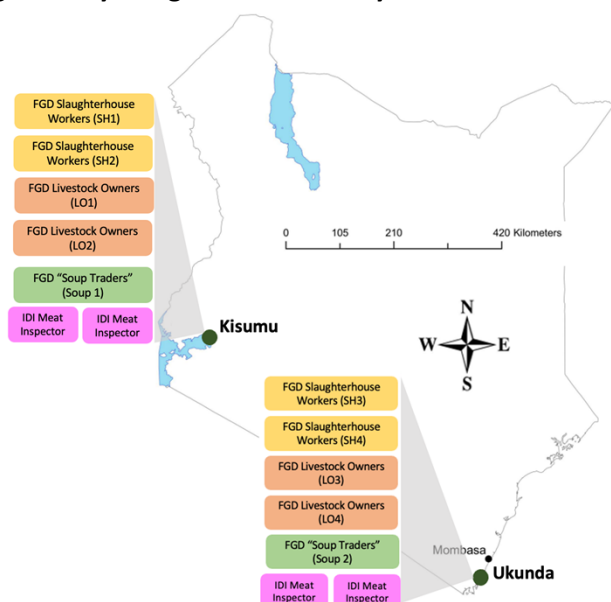

109 Figure acronyms: LO: Livestock owners; SH: slaughterhouse; FGD: focus group discussion; IDI; in-depth interview  
110 Base map: <https://africaopendata.org/dataset/kenya-counties-shapefile>  
111  
112

113 **Study Objectives**

114 This study’s main objective was to explore potential pathways of urban RVFV introduction and  
115 human exposure from the perspective of those most involved in livestock. Our five specific study  
116 objectives are presented in Table 1. Question guides were created to ensure full coverage of the study  
117 objectives and homogeneity between the study sites. The guides were piloted with smaller groups (3-5  
118 participants) from adjacent towns to gather baseline information and inform probing techniques for the  
119 moderator.

120 **Table 1: Study Objectives**

| Objective |                                                                                                                                   |
|-----------|-----------------------------------------------------------------------------------------------------------------------------------|
| 1         | <b>Explore pathways of RVFV exposure in an urban setting from the perspective of the livestock associated community</b>           |
| 2         | <b>Understand how high-risk groups in urban areas perceive personal risk of RVFV</b>                                              |
| 3         | <b>Understand the perceived difference in zoonotic disease risk compared to rural areas</b>                                       |
| 4         | <b>Explore current preventive measures in urban centers for mitigating zoonotic disease introduction and spread</b>               |
| 5         | <b>Understand current knowledge and previous experience with RVFV to predict how urban areas might respond to a RVFV outbreak</b> |

121  
122 **Study Areas**

123 The two urban study sites in this study were Kisumu city located on the shores of Lake Victoria  
124 in Western Kenya and Ukunda town which is an emerging urban center located on the South coast of  
125 Kenya. At both urban sites, nearly all animals are slaughtered in designated slaughterhouses.

126 Kisumu (0°5' 15.2247800 S, 34°46' 22.328400 E) is the third largest city in Kenya and a business  
127 hub at an altitude of 1,100 meters above sea level, and had a population of 610,082 inhabitants in the  
128 2019 census (23). Temperatures are on average 23°C (16-33°C) and total rainfall averages 1,966 mm per  
129 year with a relative humidity of 63% (24). The West of Kenya was previously classified as low risk for  
130 RVFV outbreaks; however, during the 2018 outbreak, RVFV was detected in adjacent Siaya County of the  
131 Western region for the first time (25).

132

133 Ukunda (4°16' 38.8992" S, 39°34' 9.0012" E) is located on the South coast of Kenya 30 km South  
134 of Mombasa at an elevation of 24 meters above sea level with an estimated population of about  
135 100,000 people and represents an area of recent urbanization in Kenya (20). Temperatures are on  
136 average 28°C (23-34°C) and total rainfall averages 1,060 mm, per year with a relative humidity of 74%  
137 (26). Kwale County has been involved in at least 10 national RVFV outbreaks (27) and recent studies  
138 classified Kwale County among the high-risk areas for epizootic RVFV transmission in Kenya (27).

### 139 ***Participants and participant recruitment***

140 We worked with key informants and community health volunteers to identify a representative  
141 sample of the urban livestock community. We aimed to recruit seven to ten participants for each FGDs  
142 involving slaughterhouse workers, slaughterhouse soup traders (described below), and livestock owners.  
143 Participants were identified two weeks prior to being invited to participate in the FGDs and attempts  
144 were made to capture an equal number of men and women of all age groups and religions.

### 145 ***Slaughterhouse workers***

146 Four groups of slaughterhouse workers were recruited from the two main slaughterhouses at  
147 each site, and we invited participants that carried out all slaughterhouse activities including the  
148 slaughterman, skinners, and meat filleters. The slaughterhouse manager was only included if they  
149 participated in the daily activities on the slaughterhouse floor. To be included in this group  
150 slaughterhouse employees must have worked at the slaughterhouse for a minimum of six months.

### 151 ***Slaughterhouse Soup traders***

152 We identified individuals who purchased various products daily from the slaughterhouse,  
153 including the heads, hooves, offal, and blood and invited two groups total, one from each site, to  
154 participate in this study. These individuals handle animal products shortly after slaughter and boil the  
155 heads and hooves to soup that is sold by the roadside. The most common practice among this group is  
156 making soup from these products and therefore, we collectively refer this group as the "slaughterhouse

157 soup traders” (SSTs) throughout this manuscript. They also collect blood to either make local blood  
158 sausage (mtura) or sell blood privately to farmers as livestock feed. To be included, SSTs must have  
159 purchased either blood or animal products at least three days per week over the past six months.

#### 160 ***Livestock owners***

161 Four groups of livestock owners, two at each site, were recruited for this study. Ownership in  
162 this study was defined as possessing at least one cow, sheep, or goat and we specifically aimed to  
163 identify participants involved in local dairy production and business. Although livestock owners with  
164 dairy animals were targeted, participants who owned multiple livestock for meat production were also  
165 invited.

#### 166 ***Data collection***

167 The slaughterhouse FGDs took place in a private room or designated area at the respective  
168 slaughterhouse. Livestock owners were invited to meet at a central public location that was identified by  
169 key informants and deemed an acceptable travel distance from the participants’ homes. At enrolment,  
170 basic demographics were collected for each study participant. FGDs were carried out in Kiswahili except  
171 for the SSTs group in Kisumu, which was conducted in the local language, Dhuluo, preferred by all  
172 participants. All groups and interviews were audio recorded with a Sony IC audio recorder (ICD-PX470)  
173 and transcribed verbatim in English within one week by the moderators and their assistants.  
174 Randomized quality control spot checks were carried out for each transcript by a second transcriber and  
175 any discrepancies were discussed.

176 The first author of this study was present at all the FGDs serving as the note taker and personally  
177 led the IDIs. A moderator and assistant moderator were trained from each site and the moderator from  
178 the first site (coast) was physically present for the piloting and training at the second site (West) to  
179 ensure consistency in data collection. Team training focused on understanding how the study objectives  
180 related to RVFV epidemiology and highlighted the importance of minimizing responder bias.

181 **Data Analysis**

182 Transcripts were read from which a codebook was developed for thematic analysis. The  
183 transcripts were uploaded into NVivo (*Version 1.5, 4577*) and transcripts were coded by two  
184 independent coders according to the codebook and organization of codes was discussed in real-time.  
185 The coded transcripts were verified by a mutual third coder to ensure consistency.

186 All FGD data were analyzed together for a collective understanding of urban perspectives and  
187 where appropriate, differences between the groups and two study sites were noted. A thematic analysis  
188 was carried out to identify prominent themes in the qualitative data. IDIs provided data triangulation  
189 from a different perspective and IDI analysis focused on themes identified in the FGDs. Text has been  
190 summarized in the results section from detailed ethnographic accounts.

191 **Ethics**

192 This study in its entirety was approved by the Institutional Review Board (IRB) at Stanford  
193 University ([IRB-57869](#)) and the Technical University of Mombasa IRB (TUM ERC EXT/004/2019(R)). Field  
194 activities were initiated after receiving a research permit from the Kenyan National Commission for  
195 Science, Technology, and Innovation (NACOSTI). Meetings with local administrators (County  
196 Commissioners, Deputy County Commissioners, Assistant County Commissioners, Chiefs and Assistant  
197 Chiefs) were held to obtain their approvals. Meetings with the community were not conducted due to  
198 the then existing Ministry of Health COVID-19 guidelines. Participants were sensitized during  
199 recruitment and invited to participate on a voluntary basis. All participants received the same briefing  
200 during consenting and were allowed to ask any questions to the group or privately. Before beginning,  
201 participants were informed that the study was focused on Rift Valley Fever and their responses could be  
202 used to inform policy and disease control in their area. To decrease the risk of responder bias, questions  
203 specific to the disease dynamics were deferred to the end of the FGD. The assistant moderator spent a  
204 minimum of ten minutes explaining the study procedures and informing participants their rights as a



205 research study participant. Understanding of informed consent was assessed through a checklist at the  
206 end of the consent form and each participant signed a consent form and was given a copy. All  
207 participants were above Kenya's adult consenting age of 18 years and were compensated for their lost  
208 time and transport costs to attend the meeting point.

## 209 **Results**

210 Ninety-one participants from ten different FGDs (n=87) and four IDIs (n=4) were enrolled in this  
211 qualitative study and participated until the end of their session. A summary of FGD participant  
212 demographics is represented in Table 2. Data saturation was achieved in the final FGDs from the  
213 slaughterhouse groups and livestock owners. This was confirmed by codebook developers and no  
214 additional themes were added after the final groups. FGD length varied from 46 to 94 minutes. At the  
215 coast site (Ukunda), it was challenging to identify female livestock owners despite best efforts from the  
216 key informants and snowball sampling techniques. Given the gender ratio for the recruited livestock  
217 owners of 13M:4F in Ukunda, it was decided to organize one group of only men and another group with  
218 50% men and 50% women. All slaughterhouse workers at both sites were men; however, women were  
219 involved at the slaughterhouse as SSTs. All SSTs in Kisumu were women and the years of experience in  
220 this group was comparable to other slaughterhouse staff. The IDIs were with two men and two women  
221 and to protect the identity of the meat inspectors, age and location has not been reported.

222

223

224

225

226

227

228

229

230

231

232 **Table 2: Focus Group Discussion Participant Demographics**

233

| Demographic                                                                                                     | Ukunda (coast)                                                                                                        |                                            |                                                                        |                                                                                                          |                                  | Kisumu (West)                                                           |               |               |               |                | Total            |
|-----------------------------------------------------------------------------------------------------------------|-----------------------------------------------------------------------------------------------------------------------|--------------------------------------------|------------------------------------------------------------------------|----------------------------------------------------------------------------------------------------------|----------------------------------|-------------------------------------------------------------------------|---------------|---------------|---------------|----------------|------------------|
|                                                                                                                 | SH1                                                                                                                   | SH2                                        | SST1                                                                   | LO1                                                                                                      | LO2                              | SH3                                                                     | SH4           | SST2          | LO3           | LO4            |                  |
| n=<br>(Gender M/F)                                                                                              | 8 (M)                                                                                                                 | 9 (M)                                      | 4 (M)<br>6 (F)                                                         | 8 (M)                                                                                                    | 5 (M)<br>4 (F)                   | 9 (M)                                                                   | 8 (M)         | 8 (F)         | 5 (M)<br>5(F) | 4 (M)<br>4 (F) | 60 (M)<br>27 (F) |
| Median age<br>(years) [range]                                                                                   | 38<br>[32-50]                                                                                                         | 37<br>[19-66]                              | 37<br>[30-62]                                                          | 51<br>[26-75]                                                                                            | 48<br>[20-78]                    | 35<br>[24-49]                                                           | 34<br>[26-56] | 52<br>[22-70] | 46<br>[28-69] | 52<br>[22-70]  | 41<br>[19-78]    |
| Median exp.<br>(years) [range]                                                                                  | 2<br>[10-13]                                                                                                          | 14<br>[1-30]                               | 6<br>[1-10]                                                            | 11<br>[2-28]                                                                                             | 10<br>[4-45]                     | 15<br>[1-30]                                                            | 6<br>[3-10]   | 9<br>[5-40]   | 14<br>[2-52]  | 9<br>[5-40]    |                  |
| Job (SH),<br>Animals Owned<br>(LO), or SH<br>purchases (SST)<br><br>(n=participants<br>total)                   | Manger (2)<br>Skinning (6)<br>Intestines (2)<br>Slaughterman (2)<br>Cleaning (2)<br>Filleter (2)<br>Source cattle (1) | Heads<br>Blood<br>Hooves<br>Tails<br>Offal | Cos (13)<br>Goats (12)<br>Sheep (4)<br><br>9 owned<br>multiple species | Manager (1) *<br>Skinning (9)<br>Slaughtering (2)<br>Intestines (2)<br>Cleaner (2)<br><br>*Also skinning | All<br>Heads<br><br>Blood<br>(1) | Cows (11)<br>Goats (12)<br>Sheep (1)<br><br>9 owned<br>multiple species |               |               |               |                |                  |
| SH: slaughterhouse; LO: livestock owners; SST: slaughterhouse soup traders<br>M/F: male/female; exp: experience |                                                                                                                       |                                            |                                                                        |                                                                                                          |                                  |                                                                         |               |               |               |                |                  |

234

235 ***Socio-cultural dimensions***

236 Analysis focused on themes that were relevant to the study objectives and eight prominent  
237 themes (1-8) emerged from the qualitative data. Key messages under each theme have been presented  
238 and notable quotations direct from the participants are organized under each theme.

239 **Theme 1: Social and economic value of urban livestock**

240 Livestock and their products were referred to as urban business opportunities, but they still  
241 retained personal sentiment. The sale of animal products paid children’s’ school fees and other daily  
242 expenses, while selling livestock was reserved for financial hardships or to offer as dowry for marriage.  
243 At least five women in one of the Kisumu livestock owners’ groups and all in the SSTs group regarded  
244 that the ability to personally generate income brought them pride. The slaughterhouse workers also  
245 expressed pride in providing safe protein to their communities.

246 The SSTs demonstrated that all animal parts can be used for income generation including the  
247 heads, hooves, and blood. Both SSTs groups noted that their products provided customers with a less

248 expensive protein source. Blood that was less fresh could be sold to farmers as feed for pigs (West SSTs)  
249 and poultry (all SSTs). All slaughterhouse sales were conducted as private business and the Ukunda  
250 slaughterhouse groups highlighted the businessperson who purchased the live animal at market would  
251 lose their money if a carcass was condemned.

252

253 *"I have also educated my children through it, so I see it has helped me. My husband had passed*  
254 *on and I was left with them. So, these heads have helped me educate them [my children] ...and I am*  
255 *now left the little I get I eat" – Kisumu SST R3*

256

257 One major socioeconomic benefit of slaughterhouses mentioned by all four slaughterhouse  
258 groups was the reduction in community livestock theft due to the requirement for an official stamp on  
259 all marketed meat.

260

261 *"These slaughterhouses have helped in so many ways, cattle theft is very low because when you steal an*  
262 *animal after slaughtering, it isn't stamped. You'll have to explain where you got the animal, so even the*  
263 *thieves fear and so it helps the livestock owners too" – Ukunda SH2 R5*

264

## 265 **Theme 2: Connecting human health and animal product consumption**

266 Fresh milk and blood were animal products reported to be linked to human health. Local fresh  
267 milk was preferred, particularly for children and babies, because of concerns for chemicals in  
268 commercially packed milk. Trust in fresh foreign milk that arrived from surrounding regions was lower  
269 than local milk, as they believed the foreign milk had chemicals, adulterants, and water as this was the  
270 only way to compete with commercial milk prices.

271           Among dairy owning livestock owners, it was understood that boiling milk was important for  
272 health, but local fresh milk was still sold un-boiled, and it was to be decided by the consumer to boil the  
273 milk or not. At least two participants agreed with this and added that some people drink milk direct  
274 from the cow and they do not have any health consequences, so therefore, “the dangers are higher than  
275 the truth.” However, most participants in the livestock owners’ group recognized milk could cause  
276 disease and a commonly known consequence of raw milk consumption was diarrhea. Fresh milk was not  
277 just for food but also used as medicine, and tuberculosis (TB), burns, HIV, and arthritis were specifically  
278 mentioned to be treated with fresh milk.

279           Fresh, raw blood was also consumed as a cure for health problems in Kisumu. The  
280 slaughterhouse workers shared that blood was collected in plastic jugs and sold to the SSTs who  
281 confirmed to purchase these products. The meat inspector veterinarian from this slaughterhouse also  
282 affirmed this exchange and recognized that because the blood was pooled from multiple animals it was  
283 difficult to remove any if a contributing animal to the pool was condemned. Direct consumption of raw  
284 blood from the slaughterhouse was only noted in Kisumu. We did not confirm if the participant’s remark  
285 regarding doctors suggesting this practice was in reference to conventional doctors or traditional  
286 doctors.

287

288           *“You know blood from an animal is normally warm, then they drink it, the following day they come as*  
289 *well and might go even for a week and then he regains blood quickly that is what the doctor says. He is*  
290 *just someone who has been directed by a doctor that go and drink raw and direct milk from a cow.”*

291

– Kisumu SSTs R3

292

293           *“People believe that that blood boosts their immunity. When they go to the hospital, they are told,*  
294 *especially pregnant mothers, to take blood from the slaughter.” – Vet 3*

295

296 **Theme 3: Nutritional demands and livestock movement**

297 Non-local livestock entered urban center for three main reasons: additions to urban herds,  
298 arrival at the slaughterhouse to meet the high urban demand for ASFs, or as situational grazers that  
299 would arrive and graze for a given time before returning to their origin. Major drivers of livestock  
300 movement into urban centers were related to urban nutritional demands of humans and animals. We  
301 confirmed animals and animal products must be sourced from distant locations to meet the high  
302 demand from the urban population for ASFs. Meanwhile, urban livestock were reported to have limited  
303 grazing areas and/or affordable zero-grazing feed options which meant they either had to be grazed  
304 along the peri-urban periphery of the city or to scavenge locally on market vegetable waste. Opportunity  
305 to mix with local urban animals, either directly or within vector flight range, was noted for  
306 slaughterhouse arrivals and situational grazers. Animals that arrive at the slaughterhouse are not  
307 slaughtered immediately on arrival and instead holding times were dependent on the orders received by  
308 the butcheries. Both Ukunda and Kisumu slaughterhouse workers noted that animals in the holding area  
309 never “ran out” as they were always replaced with new arrivals. In Ukunda, holding time was up to one  
310 month and the animals primarily walked to the slaughterhouse overnight, even if their origin was more  
311 than 200 kilometers away. Animals in holding grazed around the slaughterhouse grounds while they  
312 recovered from their transport either on foot or in a lorry. Milk was also a commodity that entered the  
313 urban centers in large quantities to meet human nutritional demands. In Kisumu milk was noted to  
314 specifically arrive from Eldoret and Nandi. In Ukunda, milk came from nearby Shimba Hills, Lunga Lunga,  
315 and Tanzania. Milk was reported to quickly sell out as the demand for fresh milk from consumers is very  
316 high.

317 *"We first keep them, then slaughter them one by one, depending on the orders we get. We can buy*  
318 *two cows and slaughter on the same day. In short, we keep the cows here for a period of one week to a*  
319 *month depending on the orders."* – Ukunda SH1 R1

320 The situational grazers arrived near to the urban sites from far away when there is drought at  
321 their home. This practice was more common on the coast of Kenya near to Ukunda when large herds  
322 were reported to arrive when they did not have grass available at their respective homes in Kajiado and  
323 Garissa counties (two RVFV hotspots in Kenya).

324

325 *"They stay here until rains start, and they call back home and ask if the rains are there or not. If*  
326 *they are told rains are there, they go back but when they are told the situation is the same, they stay*  
327 *here."* – Ukunda LO2 R4

328

329 *"I think before December we will receive those visitors. For example, I watched the news yesterday and I*  
330 *found out that in Northeastern its dry to an extent that the cows are dying, so when there is no food,*  
331 *they start coming down here."* – Ukunda LO2 R6

332

333 Urban livestock roaming was a common practice primarily due to feed scarcity. Approximately  
334 half of all livestock owners at both sites reported to release their animals daily near to marketplaces for  
335 scavenging on vegetable scraps as this was deemed necessary for animals to meet their daily nutritional  
336 needs. Two participants noted that despite this, their animals struggled to maintain adequate nutrition.  
337 There were additional challenges associated with roaming including being detained by police, poisoning,  
338 neighbors abusing animals with knives, dog attacks, snake bites, and consumption of plastic bags.  
339 Livestock theft was not noted to be a major concern of this practice.

340

341 *“You can see our cows feeding but they are not strong. The strength we give our cows is by releasing*  
342 *them to struggle through the road to eat people’s kales along the road and to eat garbage that has been*  
343 *pushed together so that they get satisfied.” – Ukunda LO1 R3*

344

345 **Theme 4: Veterinarian involvement in slaughter and consumption preferences**

346 Overall, preferences for slaughtering and decisions for meat consumption were highly focused  
347 on the presence of the meat inspector veterinarian and his/her post-mortem examination. Trust in the  
348 veterinarian was said to overpower any personal opinions and their “final word” was mentioned by all  
349 slaughterhouse groups when prompted to discuss food safety. Groups repeatedly assured the  
350 moderator that all meat products are inspected, affirming that if the veterinarian had examined a  
351 product, then it must be safe for consumption.

352 The veterinarian’s post-mortem examination, rather than live animal examination, was seen as  
353 important as this was the best way to determine if an animal was sick. Mixed responses were received  
354 for the best time to call the veterinarian in the case of a suspected sick live animal. If slaughterhouse  
355 workers noted any signs of sickness, the animal was either slaughtered for post-mortem examination or  
356 the veterinarian was called immediately to examine the live animal. A slaughterhouse worker from  
357 Kisumu shared that if an animal arrived at the slaughterhouse and they had been sold it was hit by a car,  
358 they preferred to slaughter it quickly to determine if any part of the meat was salvageable. The SSTs  
359 who had no direct interaction with the meat inspector, also perceived their products (the heads) to be  
360 free of disease since the veterinarian had examined them.

361

362 *“I don’t think there is any risk because the meat is inspected by a doctor. It is confirmed that its healthy,*  
363 *so I don’t feel at any risk”- Ukunda SSTs R2*

364

365 *“When they are bought, we just slaughter them if they have been hit [by a car]. If it was at [nearby rural*  
366 *town], they would have been treated, but here, the medicine is the knife. We involve the vet after we*  
367 *have slaughtered to check the meat.”- Ukunda SH1 R2*

368

369 However, animals were sometimes treated for illness before slaughter and all four IDI  
370 respondents reported that every urban slaughtered animal receives an antemortem examination the  
371 day before, and they were to report to the slaughterhouse for emergencies to determine safety for  
372 slaughter if an animal arrival sick or injured. It was also mentioned in Ukunda that if the treatment was  
373 with antibiotics, a withdraw period of two weeks was observed.

374

375 *“We have a doctor here who also inspects the animals. He does inspection before we slaughter. So, if it*  
376 *is not okay, he will say that it is supposed to be treated first or it should be returned, it’s not okay. So that*  
377 *also is their work.” -Kisumu SH4 R6*

378 **Theme 5: Information-focused determinants of risk differential**

379 FGD participants were generally aware that diseases could be transmitted from animals to  
380 humans and stated the name of several zoonotic pathogens including anthrax (KSMLO4), bilharzia  
381 (KSMLO3), and tetanus (KSM SSTs). The Ukunda SSTs knew they were at risk for zoonotic disease but  
382 said that “there is no business which has no risks,” and that even the fire for cooking the products was a  
383 health risk for them. The Kisumu SSTs recognized that the slaughterman could become infected with an  
384 animal disease by inhaling the “hot blood” from the animal and concluded that while they do have some  
385 contact with the blood and animal products, the slaughterhouse workers were touching the animals  
386 more, so they were at higher risk. When risk was compared among the slaughterhouse workers groups,



387 both sites identified the slaughterman to be at the highest risk but noted that indeed everyone touches  
388 the blood.

389 The perceived occupational risk of slaughterhouse workers was heavily focused on hygiene  
390 which nearly all participants determined to be superior to rural areas because of running water  
391 availability. However, one participant in a Kisumu livestock owners group felt that urban populations  
392 were at higher risk because of congestion and air pollution.

393 Slaughterhouse workers could recognize diseases in live animals and explained that examining  
394 live animals was important at point of purchase in marketplaces. The animal's hair and eyes were  
395 examined, and other general signs of sickness were related to the animals' ability to walk, drink water,  
396 and eat normally. Post-mortem, slaughterhouse workers could sometimes determine when certain parts  
397 of the animal would be condemned even before the vet arrives, but they had to wait for their  
398 instruction and oversight. The slaughterhouse workers commonly recognized bruised meat, medication  
399 injection sites, parasites in organs and in the intestines, and abnormal livers, knowing these portions  
400 would be condemned.

401

402 *"You find the hairs have stood on end. It is difficult to know if it's the liver that is bad or what, and it's*  
403 *just there, and later when you slaughter it you find that the liver is bad."* – Kisumu SH3 R1

404

405 *"There are sick animals at the market, you have to check the health of the animals, some cows can't*  
406 *even stand, yet we buy and put in the car. When you are at the market it's hard to know.*

407

– Ukunda SH1 R1

408

409 In addition to disease transmission from animals to humans, participants from four out of ten  
410 groups connected vectors as a means of infection and explained abundance to be associated with  
411 weather and breeding sites. Flies and mosquitoes were said to be more numerous near to places  
412 livestock are kept and they were also concerned about tsetse flies and ticks. In Ukunda, one livestock  
413 owner participant recognized that if a tick bites another animal and then bites you and your animal that  
414 you could get the same disease. Additionally, livestock owners noted that when mosquitoes bite animals  
415 they also get malaria. A participant in Kisumu explained that since animals do not sleep under mosquito  
416 nets, animals are more at risk of disease transmission from vectors.

417 *“Local people can be bitten by mosquitoes; mosquitoes could have bitten an animal then it comes and*  
418 *bites you and leaves you with some diseases it got from somewhere.” – Kisumu SH4 R5*

419 When knowledge sharing was discussed, consensus was reached for wanting more training and  
420 demonstrations as fear filled gaps in knowledge. Groups specifically asked to understand transmission  
421 pathways, methods of prevention, and disease names so they could determine their risk.  
422 Slaughterhouse workers were worried that they touch the blood with their bare hands, but the  
423 inspector used a hook. Anthrax was specifically mentioned in Kisumu as one of the biggest fears and the  
424 slaughtermen knew not to slaughter if they saw abnormal bleeding in a live animal. One slaughterhouse  
425 worker in Kisumu suggested more collaboration between the meat inspector and the slaughterhouse  
426 workers to determine if it was safe to slaughter an animal. The veterinarians reported that they were  
427 dedicated to public health and the wellbeing of the slaughterhouse workers, but the slaughterhouse  
428 workers had low motivation to learn about the diseases and were focused on business.

429

430 *“I have an opinion, if it’s possible, people like us, make us learn so that we know all the diseases because*  
431 *we just keep cows and only the meat inspector knows the diseases”- Ukunda SH2 R6*

432

433 *“My worry is that, during the process I don’t know what kind of diseases I am exposed to and when it’s a*  
434 *disease that can be transmitted in the blood then we play with blood every day.” – Ukunda SH1 R7*

435 **Theme 6: Vulnerable regulations**

436 Regulations in place to protect public health were reported to be vulnerable to violations,  
437 particularly around meat certification and slaughtering of sick animals. The slaughterhouse workers  
438 group firmly affirmed that it was illegal for any dead animals to enter the slaughterhouse premises.  
439 However, at least two participants in the livestock owners group anecdotally described that in recent  
440 years, these requirements have been circumvented when meat from sick or dead animals is mis-  
441 marketed and mixed in with an officially approved animal. They also stated that these individuals who  
442 slaughter sick animals outside of the official system and may have options for receiving fake or corrupt  
443 stamps of approval on their meat. One of the main drivers for corruption in meat certification was  
444 explained to be the huge financial loss to the owner of the animal. This was noted by the livestock  
445 owners’ group in Kisumu rather than by any group at the slaughterhouses.

446 In the case of an official veterinary meat inspector condemning part or all a carcass, this process  
447 has significant oversight by these professionals. In all four IDIs, participants highlighted the importance  
448 of strict follow up during the condemnation process and all shared at least one personal story of a  
449 community members becoming sick or dying after eating meat that was purchased through a regulatory  
450 loophole and therefore, they are strict with follow-up. Notably, one of the meat inspectors from Kisumu  
451 revealed that blood is one potential product that can bypass the condemnation process because it is  
452 usually pooled early with many other animals and distributed before the inspection occurs.

453 Vulnerabilities were also present in animal movement restrictions. Data from an Ukunda IDI  
454 explained the process for requesting a movement permit and that during high-risk times issuing  
455 movement permits was suspended. However, they recognized animals do indeed still move at night  
456 undetected or use “short cuts.” In Kisumu, an IDI participant added that while there was an official

457 inspection point at border control with Tanzania, people moved their animals through an unofficial  
458 corridor or traveled at night. At the slaughterhouse, movement restrictions were understood to stop  
459 disease introduction and they were motivated to comply with regulations because they understood that  
460 if the disease arrived, slaughter bans would further affect their livelihoods.

461

462 *“It might not even be the veterinary’s stamp, the butchery people also have their own rubber stamps,*  
463 *and you will find that after the veterinary has stamped theirs on one part of the animal they then stamp*  
464 *on the other pieces or parts and mix with the other pieces.” – Kisumu LO3 R8*

465

466 *“There are those who imagine losing a whole cow, they then make a deal with the slaughter guys, they*  
467 *are then given something little then the cow is taken to the slaughter and slaughtered.”*

468

– Kisumu LO3 R10

469 **Theme 7: Experience-focused determinants of risk**

470 At least one participant from all FGDs shared an experience with a zoonotic disease control  
471 measure, and this contributed to the groups’ self-assessment of risk. At the household level, three  
472 livestock owners’ shared practices for reducing mosquitoes around their animals including draining  
473 stagnant water and burning branches to create smoke. Livestock owners also shared experience with  
474 animal movement restrictions and reactive vaccination.

475 In urban slaughterhouses, gumboots and a clean laboratory coat were required for work every  
476 day and when asked to comment on safety, participants regarded their work uniform to be important in  
477 risk reduction. At both sites, the older slaughterhouse workers (>50 years), remembered previously  
478 when there were less regulations for slaughtering and believed that the new measures do indeed  
479 reduce risk. Slaughterhouse workers also mentioned that their quarterly occupational health checks,  
480 included deworming and typhoid vaccinations, are an important component in occupational safety. The

481 slaughterhouse in Kisumu also had some restrictions for animals entering from far away not being able  
482 to graze normally with the other animals. At least five slaughterhouse workers recalled animal  
483 movement restrictions “nearly closing the meat sector” which greatly impacted their livelihoods. Groups  
484 recalled foot and mouth disease outbreaks to be (the most common cause for movement restrictions.

485

486 *“So, you know when they bring the cattle here, we don’t know the problems they have, so when the*  
487 *animals go to graze out there, they mix with the local animals. So, when they mix there, if they have*  
488 *diseases it is transmitted to the others.” – Kisumu SH3 R1*

489

490 For RVFV specifically, at least one person in each of the slaughterhouse workers and livestock  
491 owners recalled a RVFV outbreak. In Ukunda, the livestock owners noted that during the last outbreak,  
492 RVFV was present in the county, but was not seen as an urban threat. One of the meat inspectors  
493 confirmed this and expressed frustration for the lack of One Health approaches to RVFV outbreaks,  
494 sharing that in the last outbreak, cooperation from the human health sector was low until the first  
495 human case was detected in the County Hospital. The majority of FGD participants who knew about  
496 RVFV understood it to be a serious disease for livestock and reported that RVFV health messaging  
497 focused on avoiding meat and milk consumption, particularly if these products were sourced from the  
498 Rift Valley region of Kenya. Most recently, during the 2018 outbreak in Siaya (Western Kenya), three  
499 participants in the Kisumu livestock owners group recalled milk that had arrived in the center of town,  
500 from the Rift Valley Region, had been poured into the streets after the ban was announced. Another  
501 livestock owner in Kisumu, began to fear RVFV when a human in Siaya became infected. An SST in  
502 Kisumu also recalled this outbreak and added that everyone feared eating meat at that time. In Kisumu  
503 city, at least three livestock owners recalled reactive vaccination of their urban livestock.

504 A slaughterhouse worker in Kisumu noted that he was never told how to identify an animal that  
505 was infected with RVFV over the course of the outbreak, and instead heard about it on the radio. Only  
506 one slaughterhouse worker in Ukunda thought he had previously seen signs of RVFV in animals and  
507 reported that in 2010 there were numerous deaths in cattle with blood-tinged mucus draining from the  
508 nose, though this was never confirmed to be RVFV. For those that had not experienced, RVFV  
509 specifically commonly confused it with other fevers and diseases, especially when the other disease has  
510 “fever” in the name. East Coast Fever and Yellow Fever were specifically mentioned. Slaughterhouse  
511 workers pointed out that when you see something abnormal in the carcass it is challenging to know  
512 exactly what disease it is. Other participants didn’t know the disease but attempted to understand the  
513 connection with RVFV with the Rift Valley region of Kenya.

514

515 *“Yeah when the announcement came up about RVF, even I can say the milk from Nandi was everywhere*  
516 *here in Kisumu but when the news came up, it’s even hard to get...People just stopped taking the milk so*  
517 *the meat you can’t know because you don’t know where the butchery owner gets their meat from or*  
518 *where they bought it but when it comes to milk many people stopped buying. Most of the people shifted*  
519 *to the processed milk.” – Kisumu LO3 R10*

## 520 **Theme 8: Rift Valley Fever human vaccination perceptions**

521 When asked about the potential to be vaccinated against Rift Valley Fever, participants  
522 requested more information about the disease and ingredients in the vaccine before they would accept  
523 an injection. There was consensus agreement that vaccines worked to prevent diseases and people  
524 would be willing to accept a vaccine if they understood their risk. In the slaughterhouse, they were keen  
525 to be vaccinated, with some requesting vaccination the same day, because they feared high  
526 consequence diseases such as Rift Valley Fever. In Ukunda, livestock owner willingness to be vaccinated  
527 was linked to understanding that the livestock community was at higher risk.

528

529 *“It’s a must I know, what will this vaccine do to me, and what is RVF? After knowing what RVF is,*  
530 *I might agree but before that I would not accept the vaccine.” – Kisumu SH3 R7*

531

532 *“So, if you bring that vaccine, do you vaccinate everyone in the homestead or just those who*  
533 *graze or look after the animals because if it can affect me? It can also affect my children and the family.*

534 *So how you go about it is the most important thing” – Kisumu LO3 R10*

535

536 While there was indeed a high acceptance rate, barriers for accepting vaccination were also  
537 noted. The main barriers were a lack of a perceived immediate threat, fear of long-term side effects, and  
538 confusion with livestock vaccinations. The livestock owners in Ukunda believed that there should be sick  
539 animals in their area before they were to accept a vaccination themselves. More hesitancy was present  
540 in Ukunda compared to Kisumu as livestock owners were concerned that they would personally receive  
541 a cattle injection. A livestock owner in Ukunda said it would be impossible to get people to accept an  
542 injection before the disease arrives in their area. In Ukunda, one woman expressed concern the  
543 vaccination could cause infertility and all groups wanted to know the potential negative consequences  
544 of receiving a vaccine.

545

546 *“Without seeing the disease even if you say you are going to pay me to be vaccinated, still I*  
547 *won’t accept unless the animals here are sick and can transmit to humans” – Ukunda LO1 R1*

548

549 *“Cows, maybe their immunity is higher than that of human beings, so the vaccine that would be*  
550 *administered to cow is it the same as the one that would be administered to me? Are we going to run in*  
551 *the same line as that? The same injection for cows is the same as my injection?” – Kisumu LO4 R4*

552

553 **Discussion**

554           This qualitative study has highlighted factors relative to RVFV transmission and key  
555 vulnerabilities in urban livestock systems that could support successful introduction of RVFV via infected  
556 livestock. This risk is intertwined with personal sentiments, challenges faced by the urban livestock  
557 community, and private business pressure at the slaughterhouse. Inclusion of the human-centric  
558 findings presented here in urban risk management strategies could be expected to allow for earlier and  
559 targeted approaches to urban RVFV case identification.

560           RVFV has been shown to adapt to many different climatic conditions, mammalian hosts, and  
561 vectors (22). With the possibility of an imported animal seeding an infection and local herds maintaining  
562 or amplifying RVFV, urban disease ecology would differ from rural areas and current measures and  
563 surveillance approaches do not account for this. This qualitative study foreshadows how high-risk  
564 populations in urban centers could be expected to identify and respond to an introduction. First, for  
565 recognizing the first urban livestock cases, slaughterhouses are a key entry point for RVFV as animals  
566 enter in high volume from a wide geographical range. Passive syndromic surveillance of livestock alone  
567 could be expected to fail in this system as the herd context is required for the most recognizable signs of  
568 RVFV: abortion storms and death of young animals. Most animals entering the urban center are adult  
569 cattle, which often have inapparent infections (28) and could inadvertently infect slaughterhouse  
570 workers, local livestock, or urban mosquitos. The risk to local urban livestock exposure from these  
571 imported animals is highlighted by theme three (*Nutritional demands and livestock movement*) as  
572 animals have ample opportunity for mixing (either directly or within vector flight range) with non-local  
573 animals. If a local animal were to be exposed, the congested living conditions of humans and livestock in  
574 the urban setting would deepen the spillover threshold. Notably, lack of feed availability is the root  
575 cause of urban livestock roaming, and in the case of an urban outbreak, supporting nutritional demands



576 of these animals could limit unauthorized movement. Moreover, if RVFV is already present in urban  
577 vectors, livestock movement bans may be too delayed to have significant effects on the outbreak  
578 magnitude and the subsequent threat to livelihoods may not be worthwhile. Risk for urban RVFV viral  
579 maintenance is suggested by increased urban abundance of *Aedes*. spp mosquito vectors known to be  
580 important in viral amplification phases of a natural outbreak (16), we therefore hypothesize that vector  
581 exposures may play a greater role in an urban human exposures. The potential for an undetected  
582 introduction coupled with RVFV's complex epidemiology requires that prevention measures account for  
583 all aspects of transmission including human behaviors that affect risk, host interactions with vectors, and  
584 opportunities for local animals to be exposed.

585         Theme two (*Connecting human health and animal product consumption*) of this study  
586 demonstrates retention of cultural practices in urban Kenya important in RVFV transmission:  
587 consumption of raw blood and fresh milk. Pooled blood purchased directly from slaughterhouses poses  
588 a risk to everyone that handles and prepares the product as RVFV is well documented to aerosolize from  
589 infected blood, and has been linked to more severe infections (29,30). This exchange of blood from the  
590 slaughterhouse also shifts risk into the community where risk factors may be less recognizable, and  
591 exacerbates challenges differentiating human RVF disease clinically at health centers from other febrile  
592 diseases, including malaria and meningitis (31). Our findings suggest that public health messaging from  
593 previous RVFV outbreaks at our study sites to have been primarily focused on consumption of meat and  
594 milk, rather than vector exposure, and this is how participants evaluated their risk. This is in contrast to  
595 a study conducted in pastoralist communities of Northeastern Kenya where the majority of participants  
596 believed RVFV infection to be from mosquito bites rather than from consumption of milk, meat, and  
597 blood (32). The authors of that qualitative study reported that while their participants had heard of  
598 consumption related risks, their experiences didn't match their health outcomes and, to them,  
599 consumption of meat or milk was not risky for contracting RVFV. In the urban setting, meat and milk

600 consumption is common and there are multiple actors along value chains which can lead to  
601 miscommunication about origin and safety of these products. Additionally, there may be implications for  
602 blood waste management that contribute to urban transmission dynamics due to the high volume of  
603 slaughtered animals and limited physical space because inadequately managed wastewater can breed  
604 mosquitos (33). Data on viral presence and stability in blood after slaughter, milk and dairy products,  
605 and wastewater from urban slaughterhouses could quantify these public health risks and allow for more  
606 specific and directed policy that could be used to build trust and/or be leveraged for surveillance.  
607 Furthermore, integrated, and practical approaches to managing these culturally connected risks are  
608 required as both livestock owners and SSTs expressed that the ability to purchase and sell their products  
609 is important for livelihoods and women's empowerment.

610           Our study demonstrated regulatory vulnerabilities in theme six (*Vulnerable regulations*)  
611 including selling of unofficially slaughtered meat and unauthorized animal movements that should be  
612 considered in urban outbreak investigations and be integrated into future preventive measures.  
613 People's perception of risk impacts their behaviors, and this can either increase the chance of exposure  
614 (drinking blood) or be protective (refusing to slaughter dead animals). Therefore, understanding  
615 perceptions and challenges that high-risk groups face allows for a more holistic understanding of why  
616 regulatory vulnerabilities persist. We highlighted both knowledge-focused and experience-focused  
617 factors that affect perceived risk differentials between groups. With these data, we understand current  
618 slaughterhouse regulations to be focused on highly prevalent bacterial and parasitic diseases and food  
619 safety. This was demonstrated by the participants mentioning hygiene and visual inspection of organs as  
620 key measures to determine food safety and reporting that animals are inspected and therefore safe.  
621 Reliance on the postmortem examination leads slaughterhouse workers to believe that they must  
622 slaughter to determine the ailment of the animal, which neglects their own personal protection from  
623 zoonoses. With few individual exceptions, group consensus determined risk to be lower in urban areas

624 compared to rural areas because of improved urban hygiene. Still, fear filled the gaps in participant  
625 knowledge, they requested to learn more about their risk of RVFV. Awareness building and education  
626 could contribute to better alignment of the knowledge-focused determinants of risk with known RVFV  
627 transmission pathways. Messaging would be best focused on the key activities associated with urban  
628 slaughterhouse risk and risks in the greater community including handling and consumption of fresh  
629 milk and blood, accidental consumption of meat from a sick animal, and urban vector exposure.  
630 Awareness building for diseases with alternative transmission mechanisms, such as direct aerosolization  
631 of RVFV to humans, can be accomplished in parallel with continued management of other prevalent  
632 bacterial and parasitic diseases.

633           Formalizing meat trade in Kenya by requiring a stamp of inspection from qualified veterinarians  
634 has undoubtedly improved key zoonotic diseases and contributed to the improvement of Kenya's meat  
635 safety, although in alignment with other studies, conditions do not always align with Kenya's Meat  
636 Control Act (34). All meat inspector veterinarians in this study shared personal stories about the  
637 importance of oversight when condemning a carcass, yet livestock owners reported that corruption and  
638 falsification in meat certification does occur, and community-based education of vulnerable groups may  
639 alter personal decisions to partake in this risky behavior. For urban introduction of RVFV, slaughterhouse  
640 workers and their business partners may be the first line of defense in outbreak control. Full reliance on  
641 veterinarians to make key decisions for slaughtering and consumption undermines the ability for  
642 slaughterhouse workers to be leveraged in reporting sick animals. In our IDIs, veterinarians understood  
643 this public health responsibility, but added that there was insufficient diagnostic support for RVFV, and  
644 they fear missing the diagnosis. Underequipping and underpreparing urban meat inspector veterinarians  
645 for introduction of RVFV is perhaps the greatest missed opportunity to protect urban public health from  
646 RVFV. Furthermore, local One Health initiatives and better administrative cooperation between human  
647 health providers and veterinarians are required. If RVFV were to enter an urban center of an endemic

648 region and establish an urban transmission cycle, the human health, and economic effects from loss of  
649 livestock would be devastating and concern for re-emergence after would persist every subsequent  
650 flooding event. Urban livestock markets would be significantly disrupted and pressure to bypass  
651 regulations to maintain livelihoods would be high. Greater understanding of urban transmission risks is  
652 warranted now, before the first urban RVFV outbreak.

### 653 **Conclusion: Implications for policy to prevent and control urban RVFV**

654 This study has informed understanding of potential pathways of introduction in the context of  
655 current practices and urban high-risk groups' perceived risk. Tracing the pathway of blood, organs, and  
656 fresh milk could inform risks in the greater community and allow for preferential testing of RVFV at  
657 health center and inform development of inclusive surveillance programs. Possible approaches to  
658 prepare urban areas for RVF include education of high-risk groups, community-based awareness  
659 building, preventive and reactive livestock vaccination, scenario planning, and surveillance. Passive  
660 surveillance is less reliable in urban areas, and we recommend active surveillance, particularly during  
661 high-risk times, and development of laboratory procedures for pooled samples to expand cost-  
662 effectiveness.

663 An early and rapid response to RVFV introduction will be required to give urban centers the best  
664 opportunity at avoiding infection of urban mosquitos and initiation an urban transmission cycle.  
665 Quantifying mosquito vector abundance and diversity at urban slaughterhouses could advise localized  
666 vector control strategies. In the meantime, larval source reduction remains important in arboviral  
667 disease control, including RVFV (35). Integrating the themes presented here into development of future  
668 preventive measures could be expected to be more efficacious and avoid marginalization of vulnerable  
669 communities that rely on livestock to support their livelihoods when there is an outbreak. Additionally, a  
670 digital record keeping system of urban animal imports could allow veterinarians to carry out local  
671 surveillance on suspect animals that enter from high-risk markets known to source animals within high-

672 risk zones. High-risk groups, such as affiliates of the slaughterhouse and livestock owners, of urban areas  
673 would likely be the first to identify an urban introduction of RVFV and empowering them to recognize  
674 and report suspect cases would assist urban slaughterhouse veterinarians in Kenya that often have  
675 overwhelming fast-paced workloads. Urban areas must prepare surveillance frameworks and  
676 contingency plans for managing RVFV outbreaks and adapt the context of health messaging from other  
677 areas to the perceptions of their own communities.

678

### 679 ***Ethical Considerations***

680

681 This study in its entirety was approved by the Institutional Review Board (IRB) at Stanford  
682 University (IRB-57869) and the Technical University of Mombasa IRB (TUM ERC EXT/004/2019  
683 (R)). The funders had no role in study design, data collection and analysis, decision to publish,  
684 or preparation of the manuscript.

685

### 686 ***Acknowledgments***

687

688 This study was funded by NIH Fogarty Global Health Equity Scholars Program NIH,  
689 D43TW010540 (Gerken) and NIH, R-01 AI102918 (PI: LaBeaud).

690

### 691 ***Author Contributions***

692

693 **Conceptualization:** Keli Nicole Gerken, Bryson Alberto Ndenga, Francis Maluki Mutuku, Krish  
694 Seetah, Angelle Desiree LaBeaud

695 **Data curation:** Keli Nicole Gerken, Justinah Maluni, Caroline Ichura, Luti Mwashee, Makena  
696 Mwaniki, Karren Shaita, Stella Orwa

697 **Formal analysis:** Keli Nicole Gerken, Justinah Maluni

698 **Funding acquisition:** Keli Nicole Gerken, Angelle Desiree LaBeaud.

699 **Investigation:** Keli Nicole Gerken Bryson Alberto Ndenga, Francis Maluki Mutuku, Angelle  
700 Desiree LaBeaud.

701 **Methodology:** Keli Nicole Gerken Bryson Alberto Ndenga, Francis Maluki Mutuku, Luti  
702 Mwashee, Krish Seetah, Angelle Desiree LaBeaud.

703 **Project administration:** Keli Nicole Gerken, Bryson Alberto Ndenga, Francis Maluki Mutuku

704 **Resources:** Bryson Alberto Ndenga, Francis Maluki Mutuku, Angelle Desiree LaBeaud

705 **Supervision:** Bryson Alberto Ndenga, Francis Maluki Mutuku, Angelle Desiree LaBeaud

706 **Validation:** Keli Nicole Gerken, Justinah Maluni, Caroline Ichura

707 **Visualization:** Keli Nicole Gerken

708 **Writing – original draft:** Keli Nicole Gerken

709 **Writing – review & editing:** Keli N Gerken, Justinah Maluni, Francis Mutuku, Bryson Ndenga,  
710 Caroline Ichura, Luti Mwashee, Makena Mwaniki, Karren Shaita, Stella Orwa, Krish Seetah, A.  
711 Desiree LaBeaud

712  
713  
714  
715  
716  
717  
718  
719  
720  
721

## 722 References

- 723
- 724 1. Muga GO, Onyango-Ouma W, Sang R, Affognon H. Review article: Sociocultural and economic  
725 dimensions of Rift Valley Fever. *Am J Trop Med Hyg.* 2015;92(4):730–8.
  - 726 2. Tigoi C, Sang R, Chepkorir E, Orindi B, Arum SO, Mulwa F, et al. High risk for human exposure to  
727 rift valley fever virus in communities living along livestock movement routes: A cross-sectional  
728 survey in Kenya. *PLoS Negl Trop Dis* [Internet]. 2020;14(2):1–15. Available from:  
729 <http://dx.doi.org/10.1371/journal.pntd.0007979>
  - 730 3. LaBeaud AD, Pfeil S, Muiruri S, Dahir S, Sutherland LJ, Traylor Z, et al. Factors Associated with  
731 Severe Human Rift Valley Fever in Sangailu, Garissa County, Kenya. *PLoS Negl Trop Dis.*  
732 2015;9(3):1–14.
  - 733 4. Wilder-Smith A, Monath TP. Responding to the threat of urban yellow fever outbreaks. *Lancet*  
734 *Infect Dis* [Internet]. 2017;17(3):248–50. Available from: [http://dx.doi.org/10.1016/S1473-](http://dx.doi.org/10.1016/S1473-3099(16)30588-6)  
735 [3099\(16\)30588-6](http://dx.doi.org/10.1016/S1473-3099(16)30588-6)
  - 736 5. Rezende IM, Sacchetto L, Munhoz E, Augusto Alves P, Campos de Melo Iani F, Ribeiro Adelino M,  
737 et al. Persistence of Yellow fever virus outside the Amazon Basin, causing epidemics in Southeast  
738 Brazil, from 2016 to 2018 Izabela Maurício de Rezende 1✉, Livia Sacchetto 1✉, E ´rica Munhoz  
739 de Mello. 2018;1–12. Available from: <https://doi.org/10.1371/journal.pntd.0006538>
  - 740 6. WHO. Rift Valley fever Fact Sheet [Internet]. 2018 [cited 2021 Sep 16]. Available from:  
741 <https://www.who.int/news-room/fact-sheets/detail/rift-valley-fever>
  - 742 7. World Bank. Urban Development [Internet]. Understanding Poverty. 2020 [cited 2022 Mar 10].  
743 Available from: <https://www.worldbank.org/en/topic/urbandevelopment/overview#1>
  - 744 8. World Bank Group. Stocktaking of the housing sector in Sub-Saharan Africa: Challenges and  
745 opportunities. 2015;1–123.
  - 746 9. Kim Y, Métras R, Dommergues L, Youssouffi C, Combo S, Le Godais G, et al. The role of livestock  
747 movements in the spread of rift valley fever virus in animals and humans in Mayotte, 2018–19.  
748 *PLoS Negl Trop Dis.* 2021;15(3):1–19.
  - 749 10. Gerken et al TAJ of TM and H. ASTMH 2021 Annual Meeting. In: Abstract 0181. 2021. p. 1–490.
  - 750 11. Latino LR, Pica-ciamarra U, Wisser D. Since January 2020 Elsevier has created a COVID-19  
751 resource centre with free information in English and Mandarin on the novel coronavirus COVID-  
752 19 . The COVID-19 resource centre is hosted on Elsevier Connect , the company ’ s public news  
753 and information . 2020;(January).
  - 754 12. Alarcon P, Fèvre EM, Muinde P, Murungi MK, Kiambi S, Akoko J, et al. Urban livestock keeping in  
755 the city of Nairobi: Diversity of production systems, supply chains, and their disease management

- 756 and risks. *Front Vet Sci*. 2017;4(OCT).
- 757 13. Mubila M. Africa's demographic trends. 2012;1. Available from:  
758 [http://www.afdb.org/fileadmin/uploads/afdb/Documents/Policy-Documents/FINAL Briefing](http://www.afdb.org/fileadmin/uploads/afdb/Documents/Policy-Documents/FINAL_Briefing)  
759 [Note 4 Africas Demographic Trends.pdf](http://www.afdb.org/fileadmin/uploads/afdb/Documents/Policy-Documents/FINAL_Briefing)
- 760 14. Prospects 2014 revision of the World Urbanization. 2014 revision of the World Urbanization  
761 Prospects. New York; 2014.
- 762 15. Santiago-Alarcon D, MacGregor-Fors I. Cities and pandemics: Urban areas are ground zero for the  
763 transmission of emerging human infectious diseases. *J Urban Ecol*. 2020;6(1):1–3.
- 764 16. Ngugi HN, Mutuku FM, Ndenga BA, Musunzaji PS, Mbakaya JO, Aswani P, et al. Characterization  
765 and productivity profiles of *Aedes aegypti* (L.) breeding habitats across rural and urban  
766 landscapes in western and coastal Kenya. *Parasites and Vectors*. 2017;10(1):1–12.
- 767 17. Boyce MR, Katz R, Standley CJ. Risk factors for infectious diseases in urban environments of sub-  
768 Saharan Africa: A systematic review and critical appraisal of evidence. *Trop Med Infect Dis*.  
769 2019;4(4).
- 770 18. Rosser JI, Nielsen-Saines K, Saad E, Fuller T. Reemergence of yellow fever virus in southeastern  
771 Brazil, 2017–2018: What sparked the spread? *PLoS Negl Trop Dis* [Internet]. 2022;16(2):2017–8.  
772 Available from: <http://dx.doi.org/10.1371/journal.pntd.0010133>
- 773 19. Kading RC, Brault AC, Beckham JD. Global perspectives on arbovirus outbreaks: a 2020 snapshot.  
774 *Trop Med Infect Dis*. 2020;5(3):1–5.
- 775 20. Durizzo K, Asiedu E, Van der Merwe A, Van Niekerk A, Günther I. Managing the COVID-19  
776 pandemic in poor urban neighborhoods: The case of Accra and Johannesburg. *World Dev*  
777 [Internet]. 2021;137:105175. Available from: <https://doi.org/10.1016/j.worlddev.2020.105175>
- 778 21. Graham MW, Chelanga P, Jensen ND, Leitner SM, Fava F, Merbold L. A framework for assessing  
779 the effects of shock events on livestock and environment in sub-Saharan Africa: The COVID-19  
780 pandemic in Northern Kenya. *Agric Syst* [Internet]. 2021;192:103203. Available from:  
781 <https://doi.org/10.1016/j.agsy.2021.103203>
- 782 22. Olive MM, Grosbois V, Tran A, Nomenjanahary LA, Rakotoarinoro M, Andriamandimby SF, et al.  
783 Reconstruction of Rift Valley fever transmission dynamics in Madagascar: Estimation of force of  
784 infection from seroprevalence surveys using Bayesian modelling. *Sci Rep* [Internet].  
785 2017;7(January):1–10. Available from: <http://dx.doi.org/10.1038/srep39870>
- 786 23. Kenya National Bureau of Statistics. No Title. The 2019 Kenya Population and Housing Census  
787 “Counting Our People for Sustainable development and devolution of services” VOLUME IV  
788 Distribution of population by County and Sub County. Nairobi; 2019.
- 789 24. ClimateData. CLIMATE KISUMU [Internet]. [cited 2022 Mar 31]. Available from:  
790 <https://en.climate-data.org/africa/kenya/kisumu/kisumu-715071/>
- 791 25. Hassan A, Muturi M, Mwatondo A, Omolo J, Bett B, Gikundi S, et al. Epidemiological investigation  
792 of a rift valley fever outbreak in humans and livestock in Kenya, 2018. *Am J Trop Med Hyg*.  
793 2020;103(4):1649–55.
- 794 26. ClimateData. Climate Ukunda [Internet]. Available from: [https://en.climate-](https://en.climate-data.org/africa/kenya/kwale/ukunda-103112/)  
795 [data.org/africa/kenya/kwale/ukunda-103112/](https://en.climate-data.org/africa/kenya/kwale/ukunda-103112/)
- 796 27. Murithi RM, Munyua P, Ithondeka PM, MacHaria JM, Hightower A, Luman ET, et al. Rift Valley  
797 fever in Kenya: History of epizootics and identification of vulnerable districts. *Epidemiol Infect*.  
798 2011;139(3):372–80.
- 799 28. F. Glyn Davies and Vincent Martin. Recognizing Rift Valley Fever. FAO Animal. Rome; 2003.
- 800 29. Hartman AL, Powell DS, Bethel LM, Caroline AL, Schmid RJ, Oury T, et al. Aerosolized Rift Valley  
801 Fever Virus Causes Fatal Encephalitis in African Green Monkeys and Common Marmosets. *J Virol*.  
802 2014;88(4):2235–45.
- 803 30. Reed DS, Bethel LM, Powell DS, Caroline AL, Hartman AL. Differences in aerosolization of Rift

- 804 Valley fever virus resulting from choice of inhalation exposure chamber: Implications for animal  
805 challenge studies. *Pathog Dis*. 2014;71(2):227–33.
- 806 31. Javelle E, Lesueur A, Pommier De Santi V, De Laval F, Lefebvre T, Holweck G, et al. The  
807 challenging management of Rift Valley Fever in humans: Literature review of the clinical disease  
808 and algorithm proposal. *Ann Clin Microbiol Antimicrob* [Internet]. 2020;19(1):1–18. Available  
809 from: <https://doi.org/10.1186/s12941-020-0346-5>
- 810 32. Ng'ang'a CM, Bukachi SA, Bett BK. Lay perceptions of risk factors for Rift Valley fever in a pastoral  
811 community in northeastern Kenya. *BMC Public Health* [Internet]. 2016;16(1):1–10. Available  
812 from: <http://dx.doi.org/10.1186/s12889-016-2707-8>
- 813 33. Entomology M. Guidelines for preventing mosquito breeding associated with wastewater  
814 treatment and disposal in the Northern Territory. 2016;
- 815 34. Cook EAJ, De Glanville WA, Thomas LF, Kariuki S, Bronsvoort BM de C, Fèvre EM. Working  
816 conditions and public health risks in slaughterhouses in western Kenya. *BMC Public Health*  
817 [Internet]. 2017;17(1):1–12. Available from: <http://dx.doi.org/10.1186/s12889-016-3923-y>
- 818 35. Forsyth JE, Mutuku FM, Kibe L, Mwashee L, Bongo J, Egemba C, et al. Source reduction with a  
819 purpose: Mosquito ecology and community perspectives offer insights for improving household  
820 mosquito management in coastal Kenya. *PLoS Negl Trop Dis* [Internet]. 2020;14(5):1–14.  
821 Available from: <http://dx.doi.org/10.1371/journal.pntd.0008239>  
822
